# Supplementary material for: Contrasting Disease Progression, Microglia Reactivity, Tolerance, and Resistance to <em>Toxoplasma gondii</em> Infection in Two Mouse Strains
Source: Preprints.org preprint supplement (doi:10.20944/preprints202404.1333.v1), 2024-04-22
Supplement: Supplementary file 2 [file supplementary]

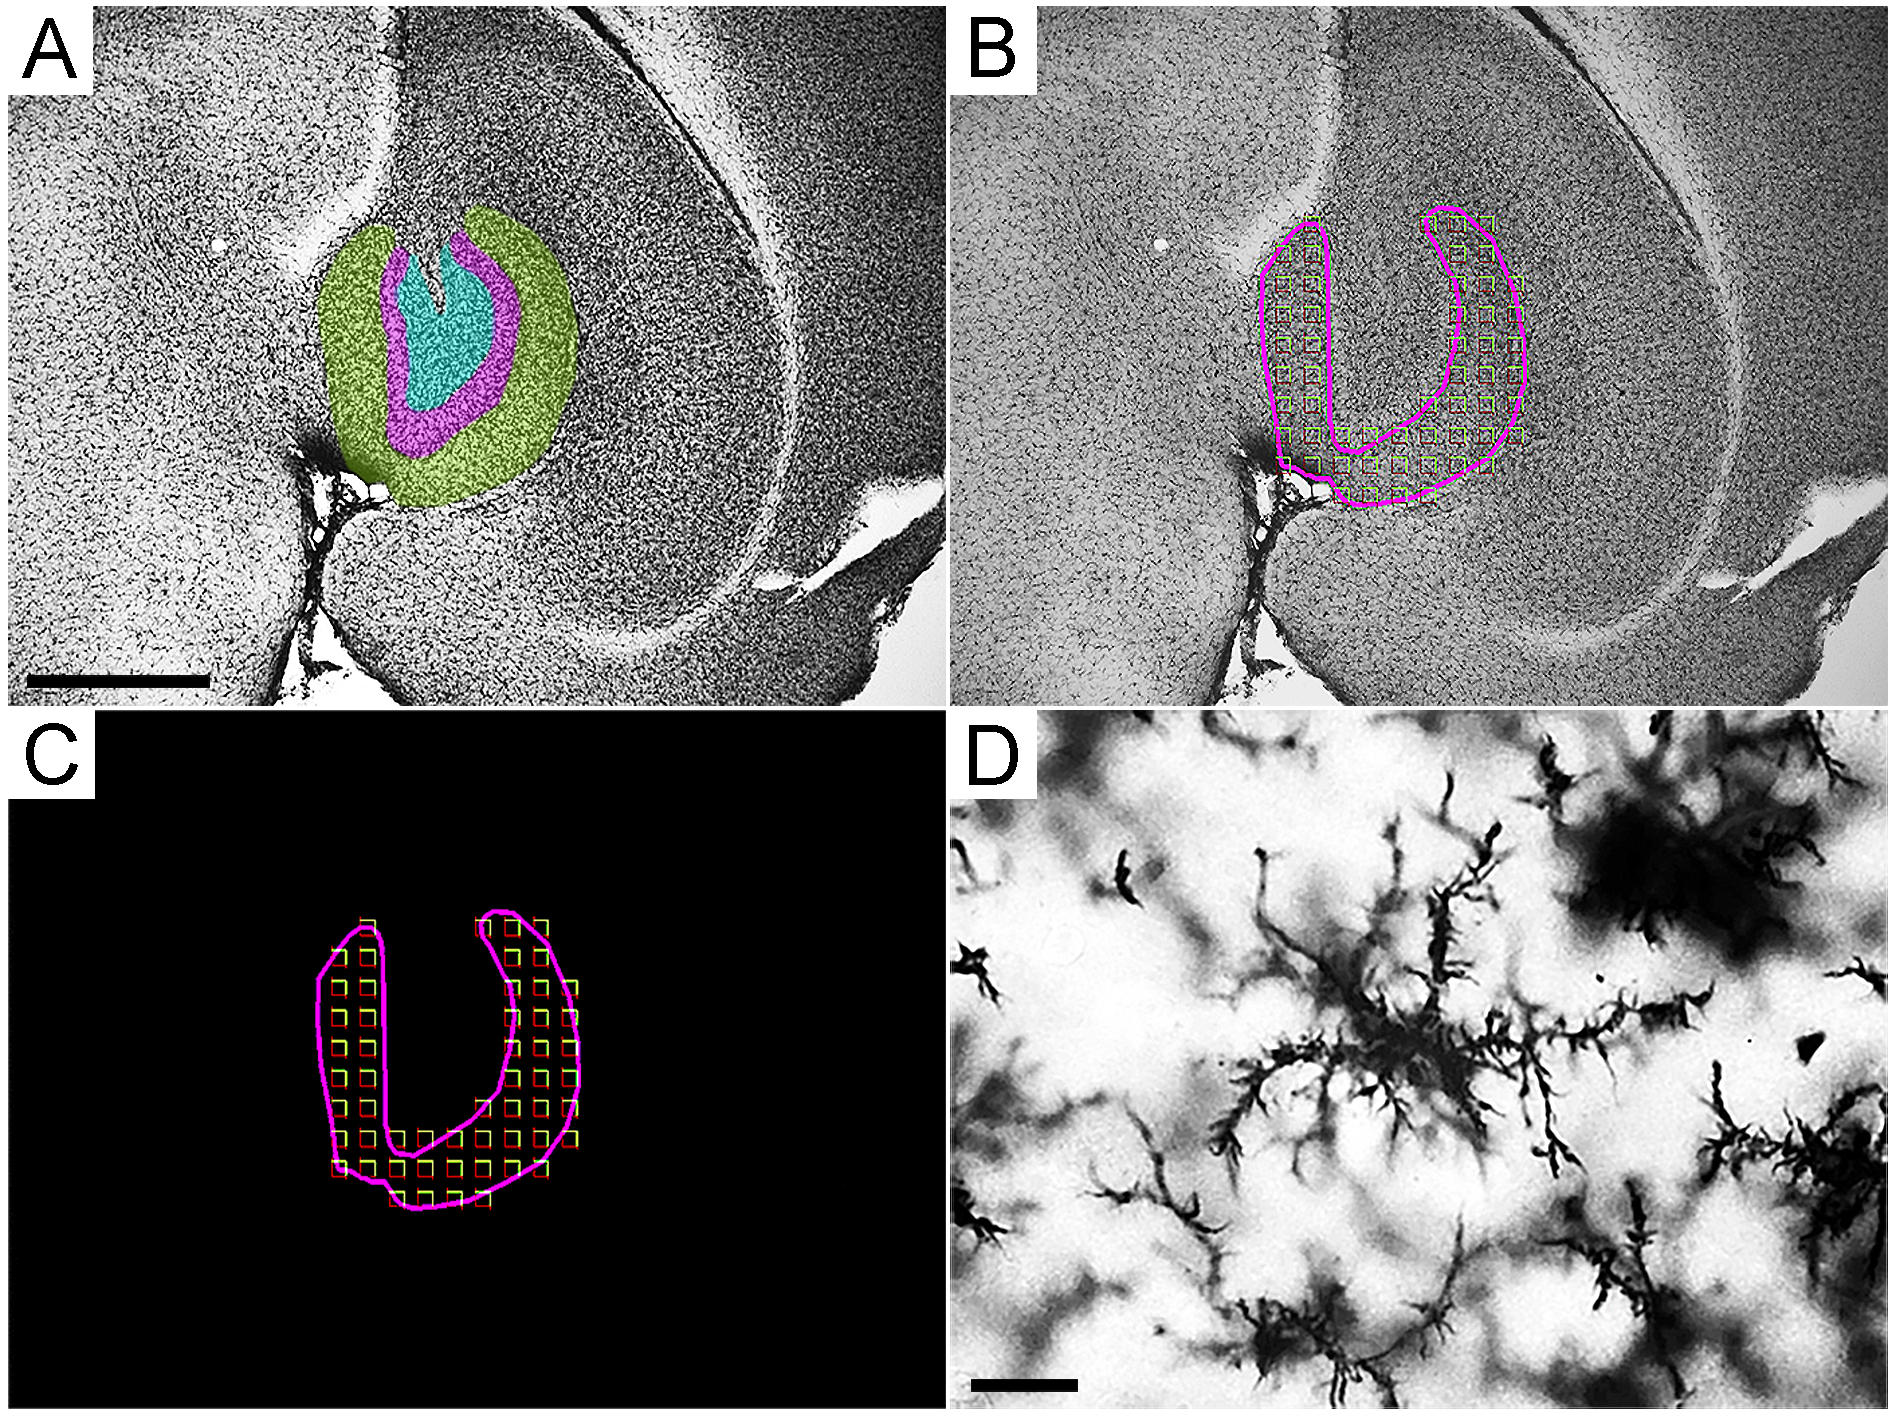


**Figure S1.** Stereological Sampling: Low-power photomicrographs (A and B) displaying the molecular layer of the dentate gyrus, the area of interest, alongside the sampling grid (C). Additionally, a high-power photomicrograph (D) showcases IBA-1 immunolabeled microglia (the object of interest). Scale bar: A - 250µm, and D: 25µm.


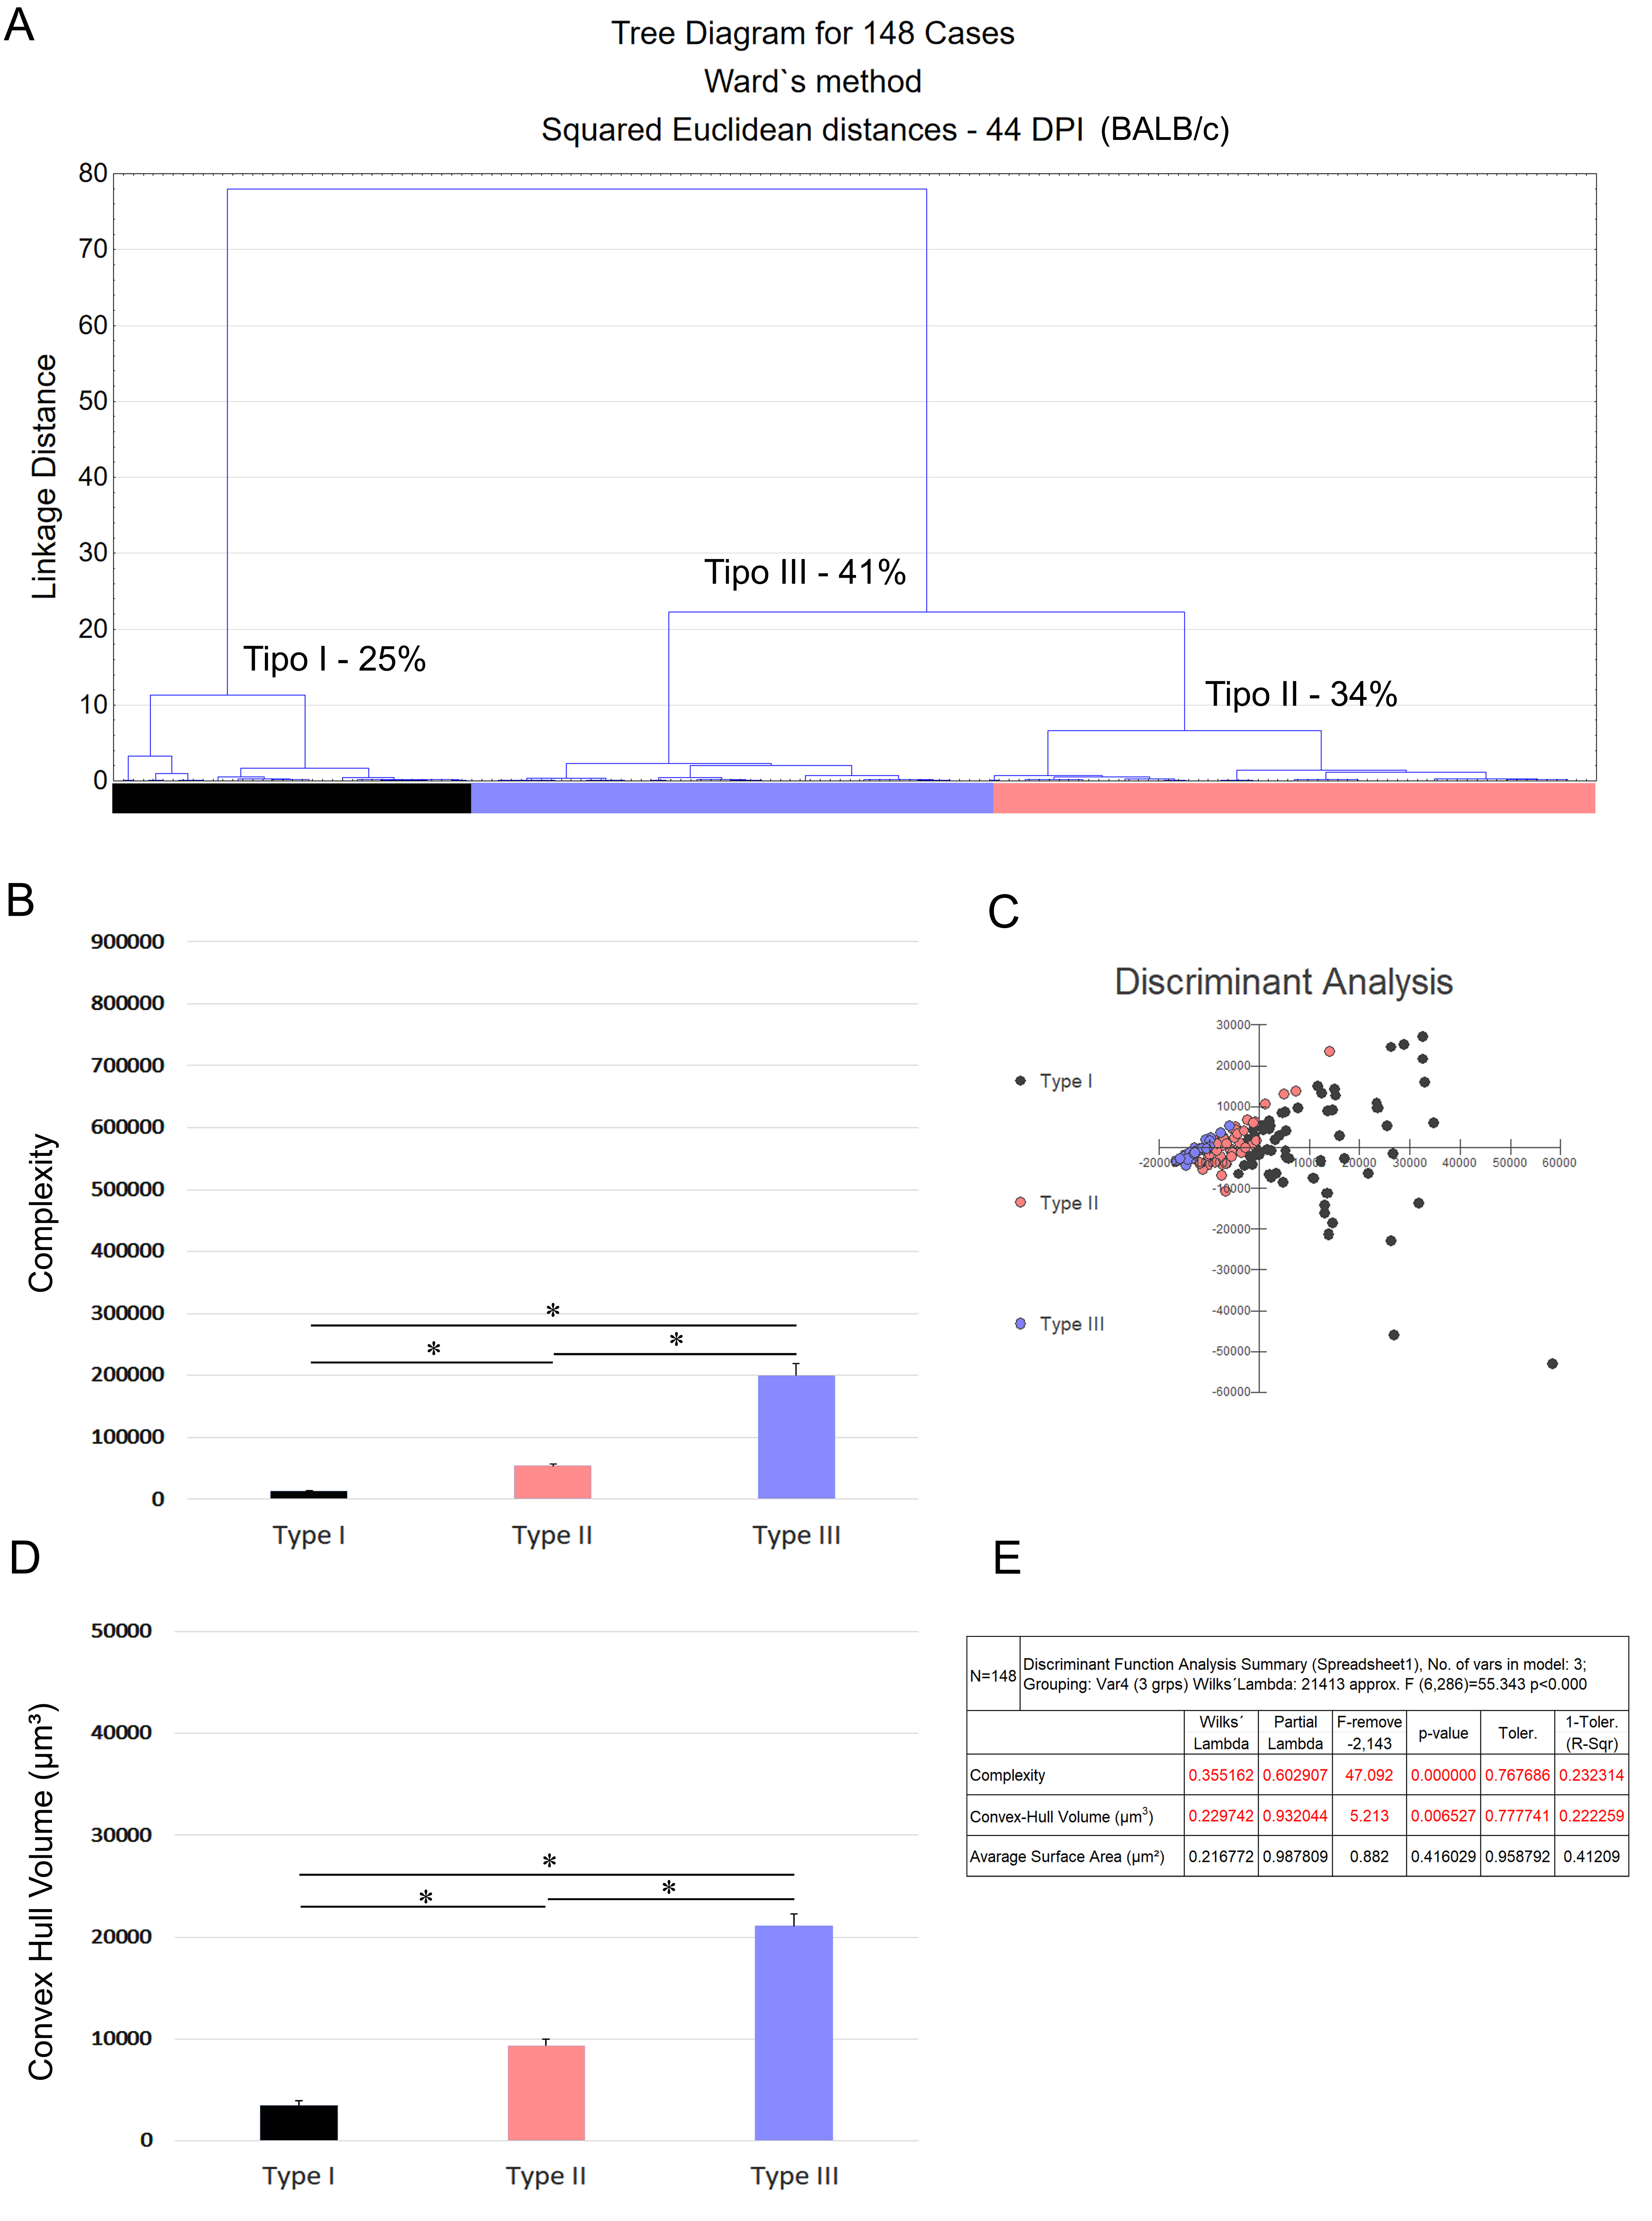


**Figure S2.** The recovery of BALB/c microglia in the molecular layer of dentate gyrus was observed 43 days after infection. At this point, only minor morphological changes were observed, and all the morphological changes induced by *T. gondii* infection at 22 dpi have disappeared. The analysis methods used included hierarchical cluster analysis (A), discriminant function analysis (C and E), morphological complexity (B), and convex hull volume (D).
